# Supplementary material for: Piezoelectric polarization-induced internal electric field manipulation of the photoelectrochemical performance in Nd, Co codoped BiFeO3
Source: Royal Society of Chemistry journal article supplement (doi:10.1039/d2nj04469b), 2022-01-01
Supplement: d2nj04469b1.pdf [file d2nj04469b1.pdf]

New Journal of Chemistry

Ms. Ref. ID : NJ-ART-09-2022-004469

**Piezoelectric polarization induced internal electric field to  
manipulate photoelectrochemical performance in Nd, Co co-doping  
BiFeO<sub>3</sub>**

Jinzhe Li<sup>1</sup>, Zhihua Liu<sup>1</sup>, Jianguo Zhou<sup>2\*</sup>, Zhengang Guo<sup>1\*</sup>

<sup>1</sup> School of Materials Science and Engineering & Tianjin Key Laboratory of Building Green Functional Materials, Tianjin Chengjian University, 300384, Tianjin, China.

<sup>2</sup> School of Science, Tianjin Chengjian University, 300384, Tianjin, China.

**Supplemental Informations**

Fig. S1 UV-vis absorance spectra of (a) Bi<sub>1-x</sub>Nd<sub>x</sub>FeO<sub>3</sub> photoanodes, and (b) Tauc plots calculated from (a).

Fig. S2 UV-vis absorance spectra of (a) BiFe<sub>1-x</sub>Co<sub>x</sub>O<sub>3</sub> photoanodes, and (b) Tauc plots calculated from (a).

Fig. S3 The XRD patterns of BiFeO<sub>3</sub> and Bi<sub>0.8</sub>Nd<sub>0.2</sub>Fe<sub>0.9</sub>Co<sub>0.1</sub>O<sub>3</sub>.

Fig. S4 Top-view and magnifying SEM images of (a) BiFeO<sub>3</sub>, and (b) Bi<sub>0.8</sub>Nd<sub>0.2</sub>Fe<sub>0.9</sub>Co<sub>0.1</sub>O<sub>3</sub>.

Fig. S5 SEM images and EDS elemental mapping diagram: (a) Bi<sub>0.8</sub>Nd<sub>0.2</sub>FeO<sub>3</sub>, and (b) BiFe<sub>0.9</sub>Co<sub>0.1</sub>O<sub>3</sub>.

Fig. S6 (a) XRD patterns, (b) Top-view SEM images of the Bi<sub>0.8</sub>Nd<sub>0.2</sub>Fe<sub>0.9</sub>Co<sub>0.1</sub>O<sub>3</sub> after the catalysis performance.

Fig. S7 Band structure diagram of Bi<sub>0.8</sub>Nd<sub>0.2</sub>Fe<sub>0.9</sub>Co<sub>0.1</sub>O<sub>3</sub>.

Fig. S8 Crystal model of Bi<sub>0.8</sub>Nd<sub>0.2</sub>Fe<sub>0.9</sub>Co<sub>0.1</sub>O<sub>3</sub>.

Tab. S1 Lattice parameters of Bi<sub>0.8</sub>Nd<sub>0.2</sub>Fe<sub>0.9</sub>Co<sub>0.1</sub>O<sub>3</sub>.

---

\* Corresponding Author Tel: +86 22 23085236 E-mail: zhoujianguo2001@163.com (J. Zhou)

\* Corresponding Author Tel: +86 22 23085236 E-mail: zhenganguo@126.com (Z. Guo)

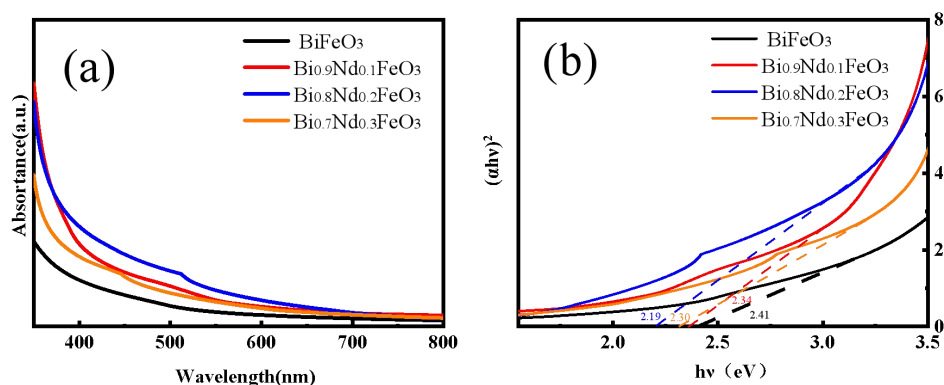

Fig. S1 UV-vis absorbance spectra of (a)  $\text{Bi}_{1-x}\text{Nd}_x\text{FeO}_3$  photoanodes, and (b) Tauc plots calculated from (a).

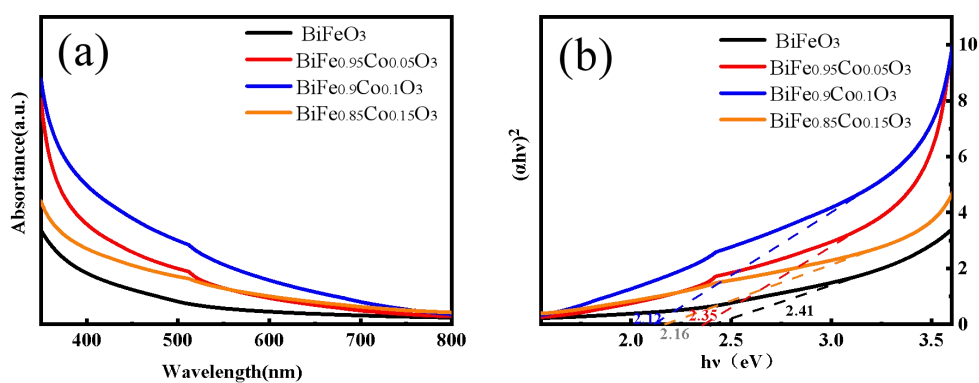

Fig. S2 UV-vis absorbance spectra of (a)  $\text{BiFe}_{1-x}\text{Co}_x\text{O}_3$  photoanodes, and (b) Tauc plots calculated from (a).

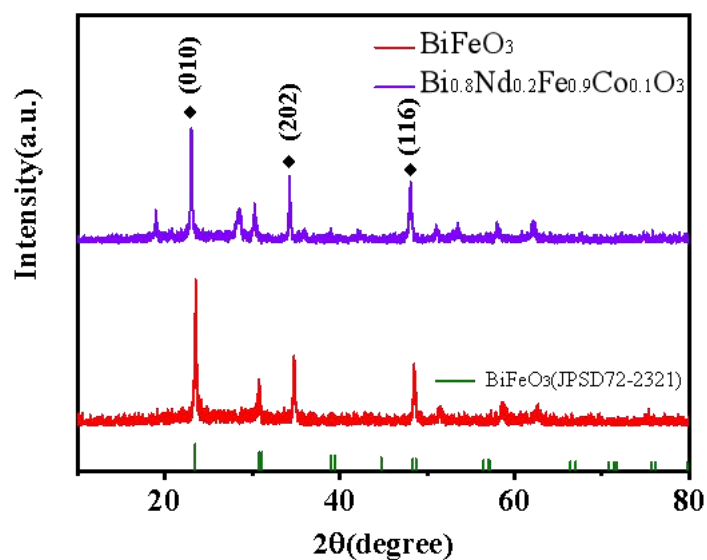

Fig. S3 The XRD patterns of  $\text{BiFeO}_3$  and  $\text{Bi}_{0.8}\text{Nd}_{0.2}\text{Fe}_{0.9}\text{Co}_{0.1}\text{O}_3$ .

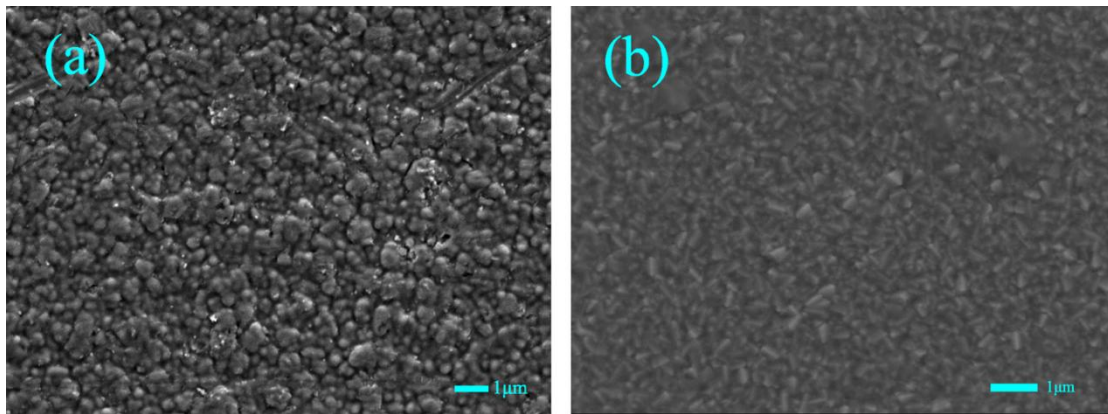

Fig. S4 Top-view SEM images of (a)  $\text{BiFeO}_3$ , and (b)  $\text{Bi}_{0.8}\text{Nd}_{0.2}\text{Fe}_{0.9}\text{Co}_{0.1}\text{O}_3$ .

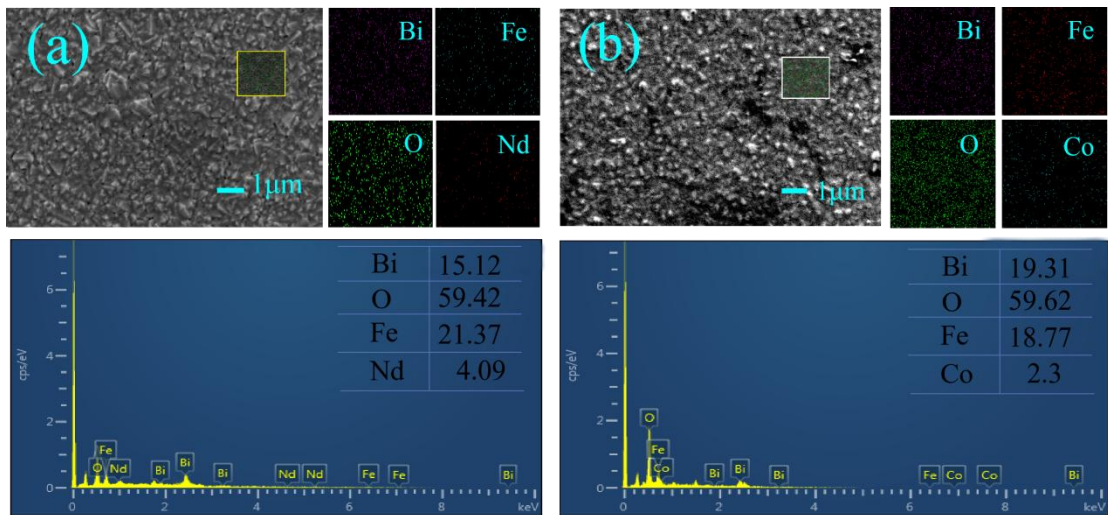

Fig. S5 SEM images and EDS elemental mapping diagram: (a)  $\text{Bi}_{0.8}\text{Nd}_{0.2}\text{FeO}_3$ , and (b)  $\text{BiFe}_{0.9}\text{Co}_{0.1}\text{O}_3$ .

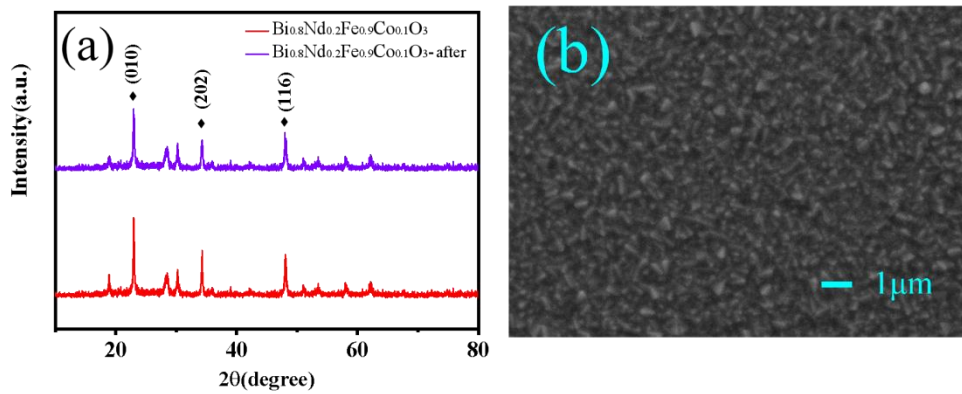

Fig. S6 (a) XRD patterns, (b) Top-view SEM images of the  $\text{Bi}_{0.8}\text{Nd}_{0.2}\text{Fe}_{0.9}\text{Co}_{0.1}\text{O}_3$  after the catalysis performance.

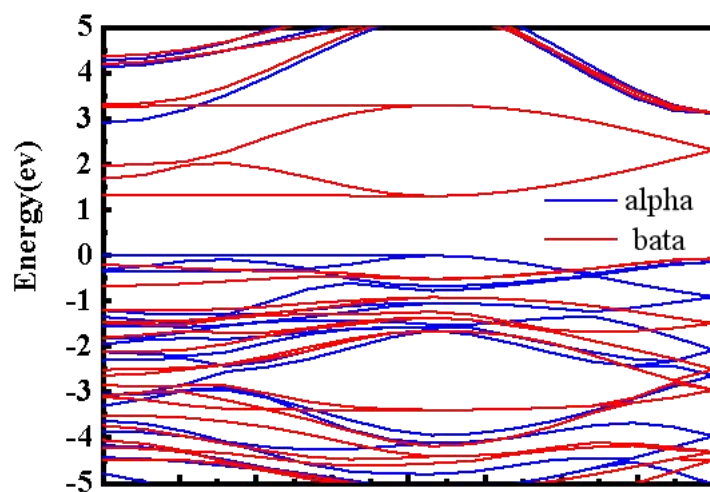

Fig. S7 Band structure diagram of  $\text{Bi}_{0.8}\text{Nd}_{0.2}\text{Fe}_{0.9}\text{Co}_{0.1}\text{O}_3$ .

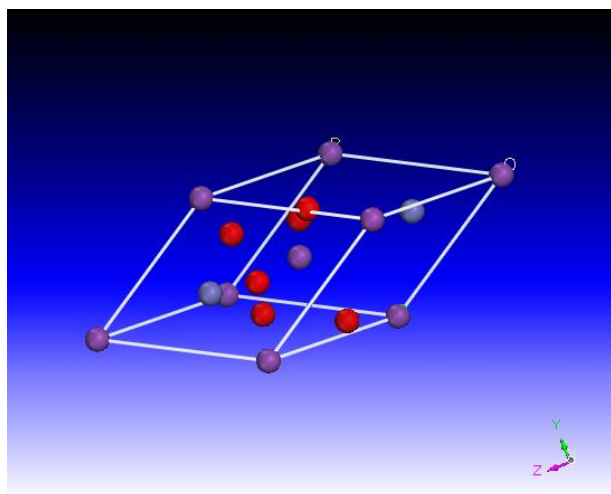

Fig. S8 Crystal model of  $\text{Bi}_{0.8}\text{Nd}_{0.2}\text{Fe}_{0.9}\text{Co}_{0.1}\text{O}_3$ .

Tab. S1 Lattice parameters of  $\text{Bi}_{0.8}\text{Nd}_{0.2}\text{Fe}_{0.9}\text{Co}_{0.1}\text{O}_3$ .

| Space group name | R3C     | Int tables number | 161     | Cell setting | trigonal |
|------------------|---------|-------------------|---------|--------------|----------|
| a                | 5.6368  | b                 | 5.6368  | c            | 5.6368   |
| $\alpha$         | 59.4238 | $\beta$           | 59.4238 | $\gamma$     | 59.4238  |
| O1               | O       | 1.39730           | 0.52330 | 0.94230      | 0.00000  |
| Nd1              | Bi      | 0.00000           | 0.00000 | 0.00000      | 0.00000  |
| Co1              | Fe      | 0.22120           | 0.22120 | 0.22120      | 0.00000  |
